# Supplementary material for: 427 損傷力学による超硬工具材料の弾塑性-損傷構成式の定式化(GS3(2) 弾性・非弾性特性,構成式)
Source: Royal Society of Chemistry journal article supplement (doi:10.1039/d3dt02270f), 2006-08-03
Supplement: d3dt02270f1.pdf [file d3dt02270f1.pdf]

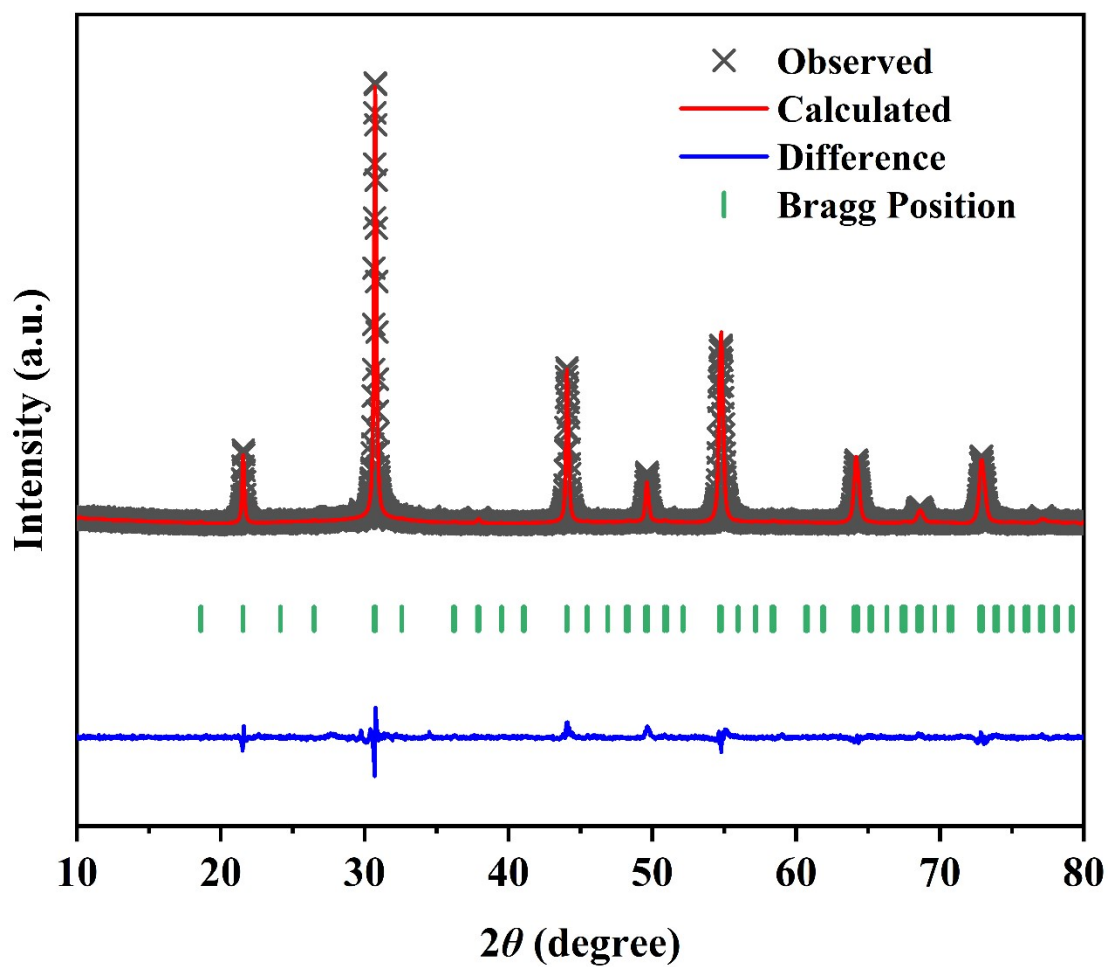

Fig. S1 Rietveld refinement result for the SLT phosphors

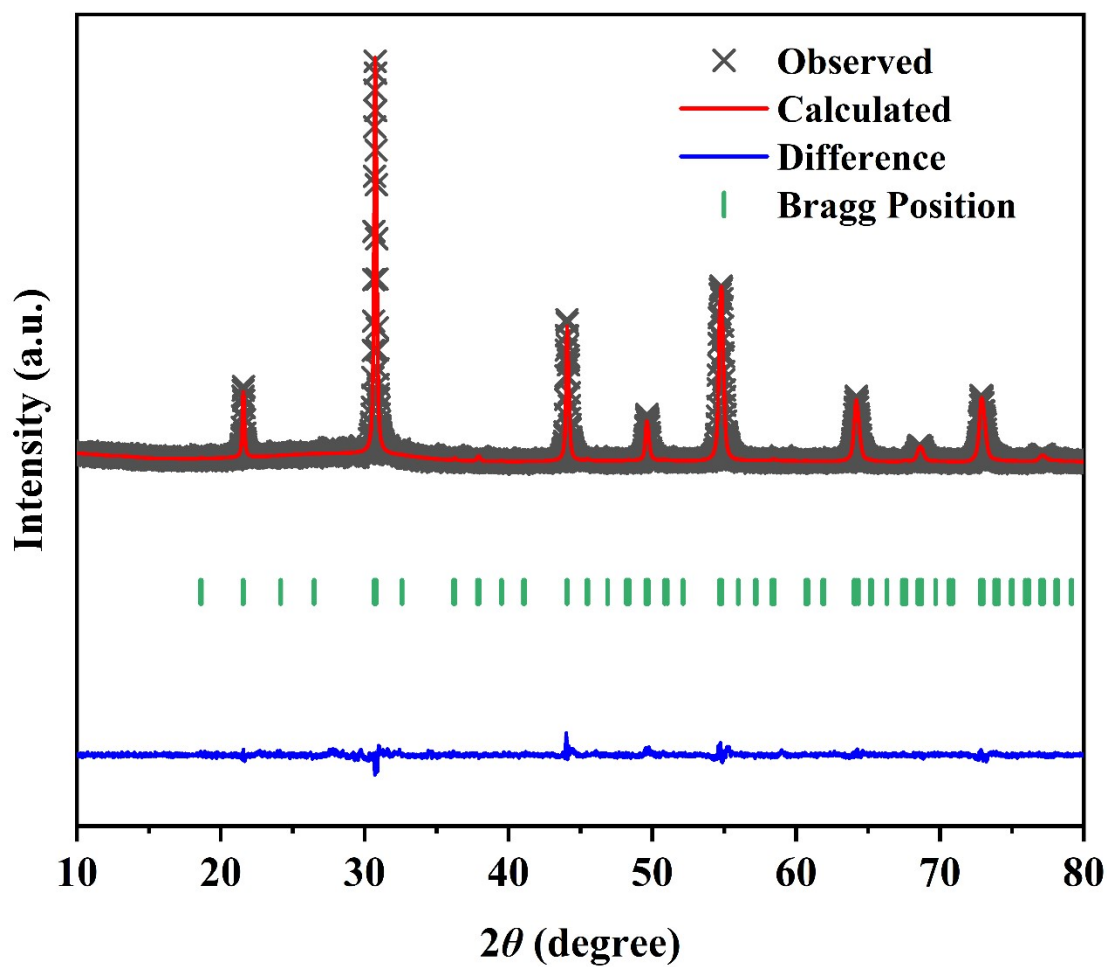

Fig. S2 Rietveld refinement result for the SLT:0.004Mn<sup>4+</sup> phosphors

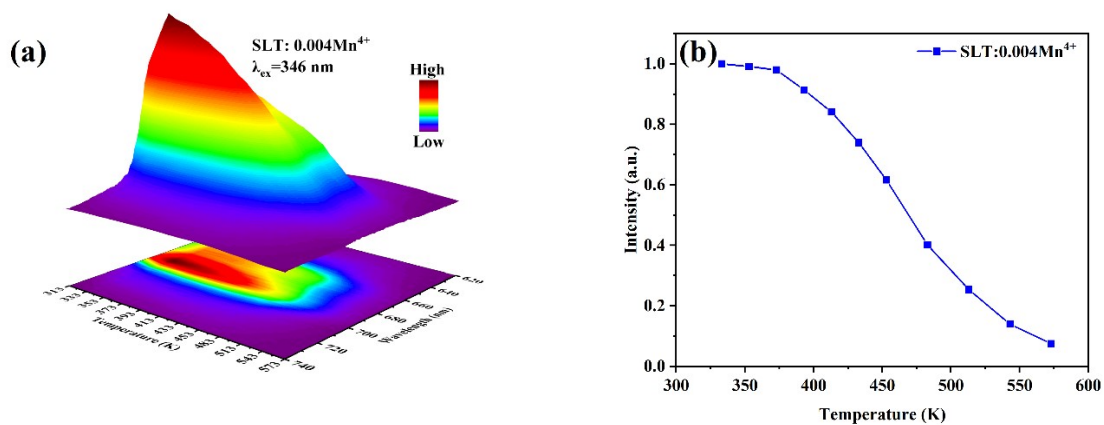

Fig. S3 (a) The PL spectra of SLT:0.004Mn<sup>4+</sup> at different temperature(313-573 K). (b) Integrated emission intensities of <sup>2</sup>E<sub>g</sub>(Mn<sup>4+</sup>) of SLT:0.004Mn<sup>4+</sup>.
